# Supplementary material for: DNA Assembly in 3D Printed Fluidics
Source: PubMed Central journal article supplement (PMC4699221; doi:10.1371/journal.pone.0143636), 2015-12-30
Supplement: pone.0143636.s001.pdf [file pone.0143636.s001.pdf]

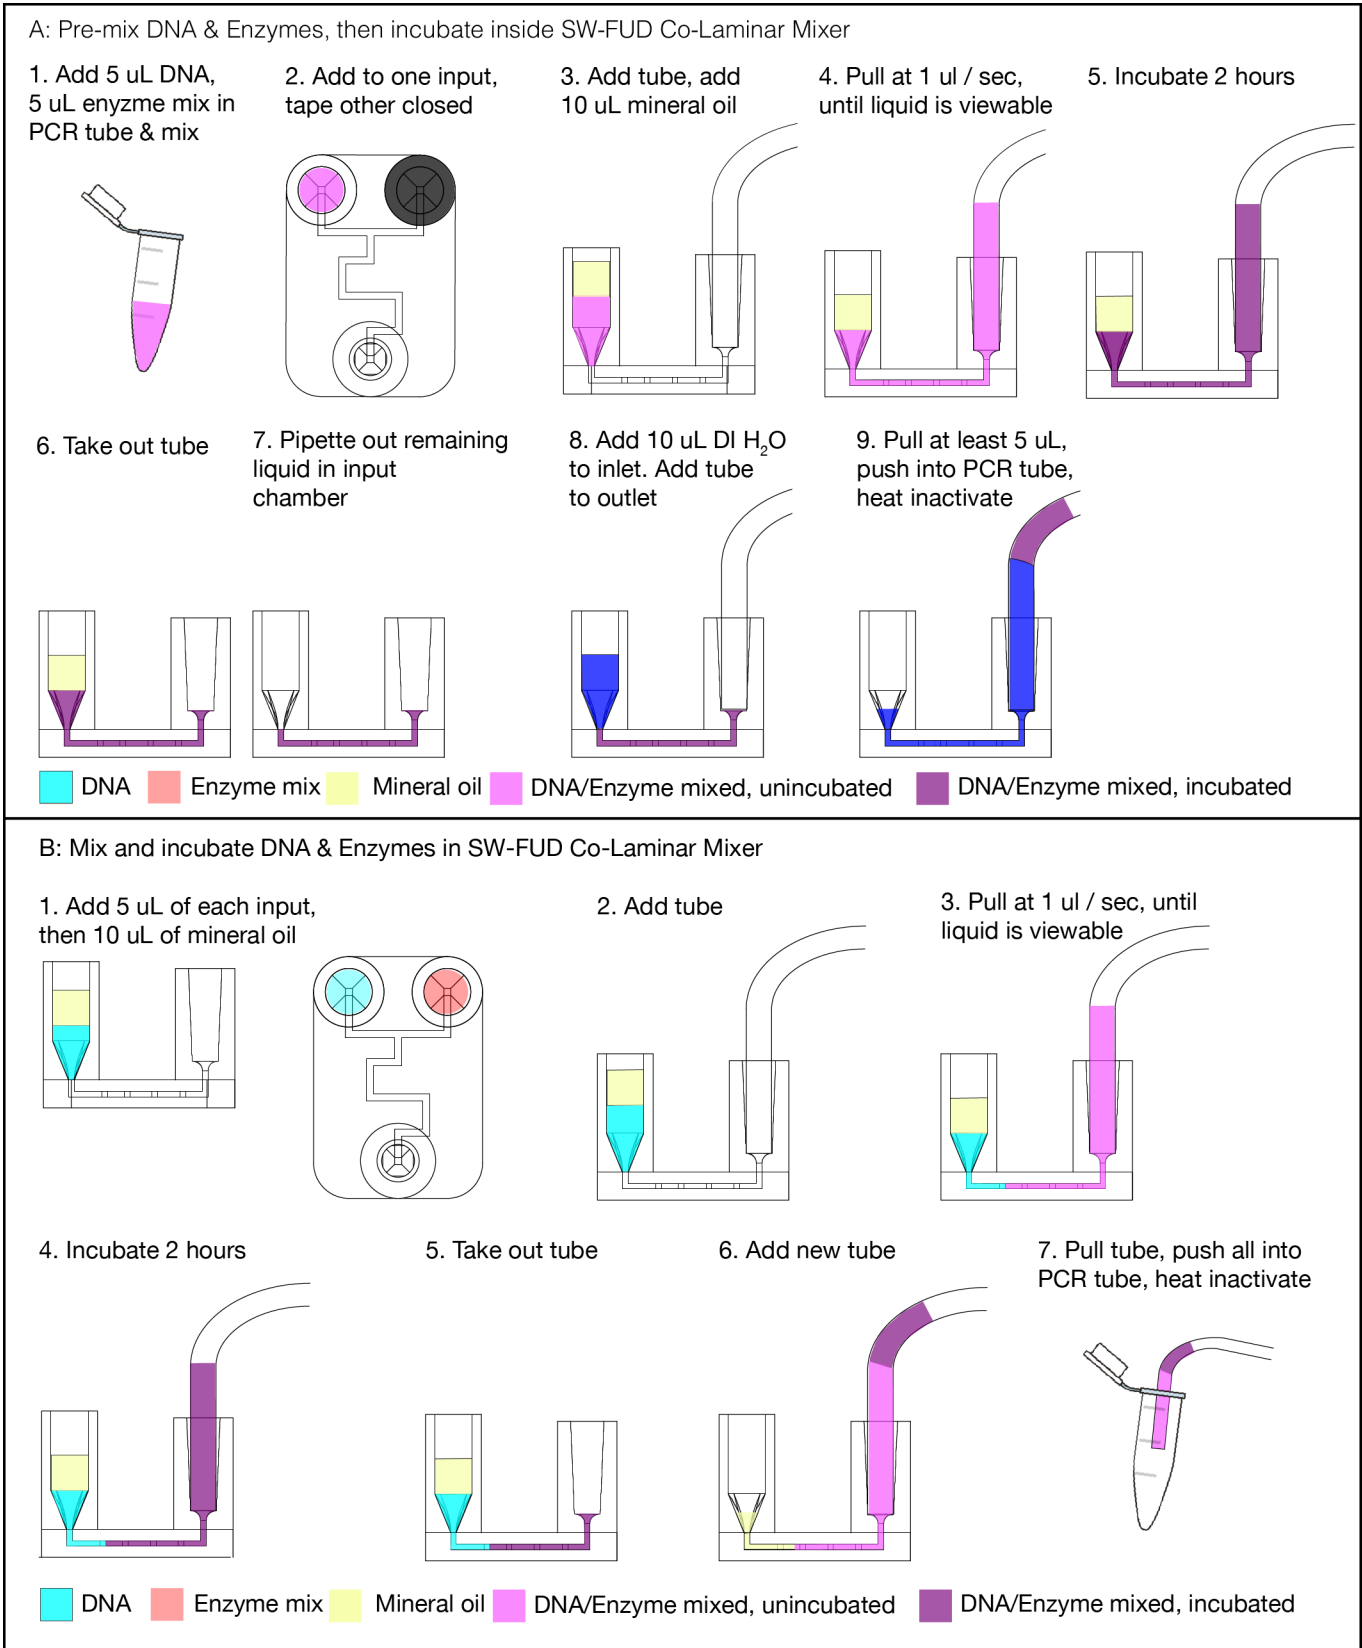

**Fig. S1 | Visual protocol for running pre-mix and on device mix for the SW-FUD device.**
