# Supplementary material for: DNA Assembly in 3D Printed Fluidics
Source: PubMed Central journal article supplement (PMC4699221; doi:10.1371/journal.pone.0143636), 2015-12-30
Supplement: pone.0143636.s007.pdf [file pone.0143636.s007.pdf]

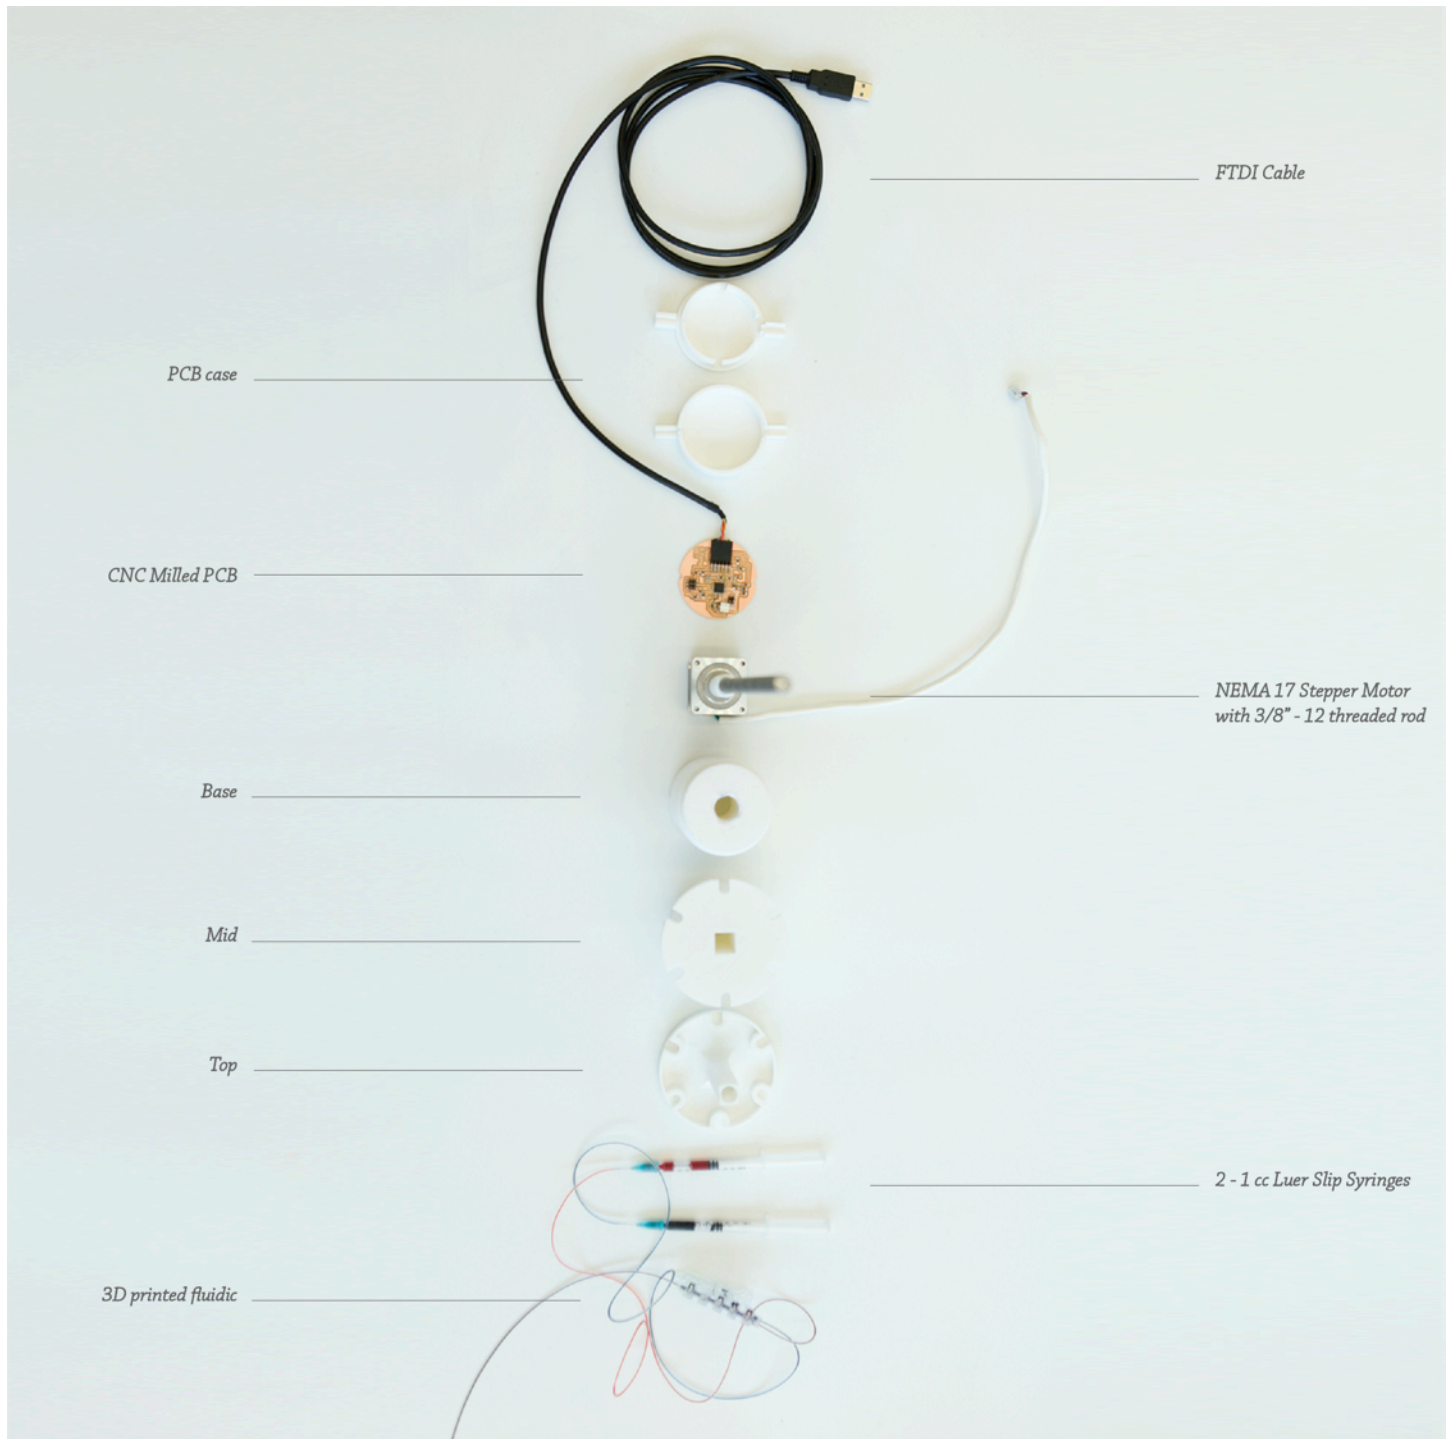

**Fig. S7 | Syringe pump components.** From top to bottom: USB-FTDI cable; 3D printed circuit board case top and bottom (optional); Milled electronic control board; Bi-polar stepper motor, threaded rod & 3D printed adapter; 3D printed base; 3D printed mid-section; 3D printed top; 2-1cc syringes with 23 gauge luer lock 1/2" dispensing needles connected to 3D printed fluidic device using 0.060" OD Tygon Microbore tubing.
