# Supplementary material for: DNA Assembly in 3D Printed Fluidics
Source: PubMed Central journal article supplement (PMC4699221; doi:10.1371/journal.pone.0143636), 2015-12-30
Supplement: pone.0143636.s008.pdf [file pone.0143636.s008.pdf]

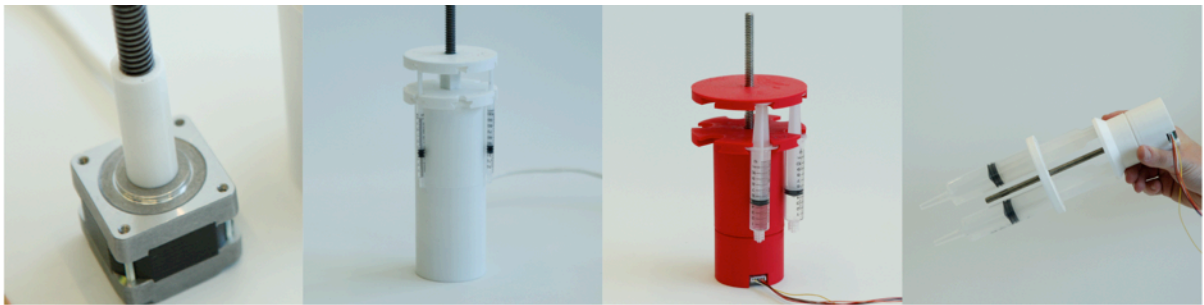

*Modular versions*

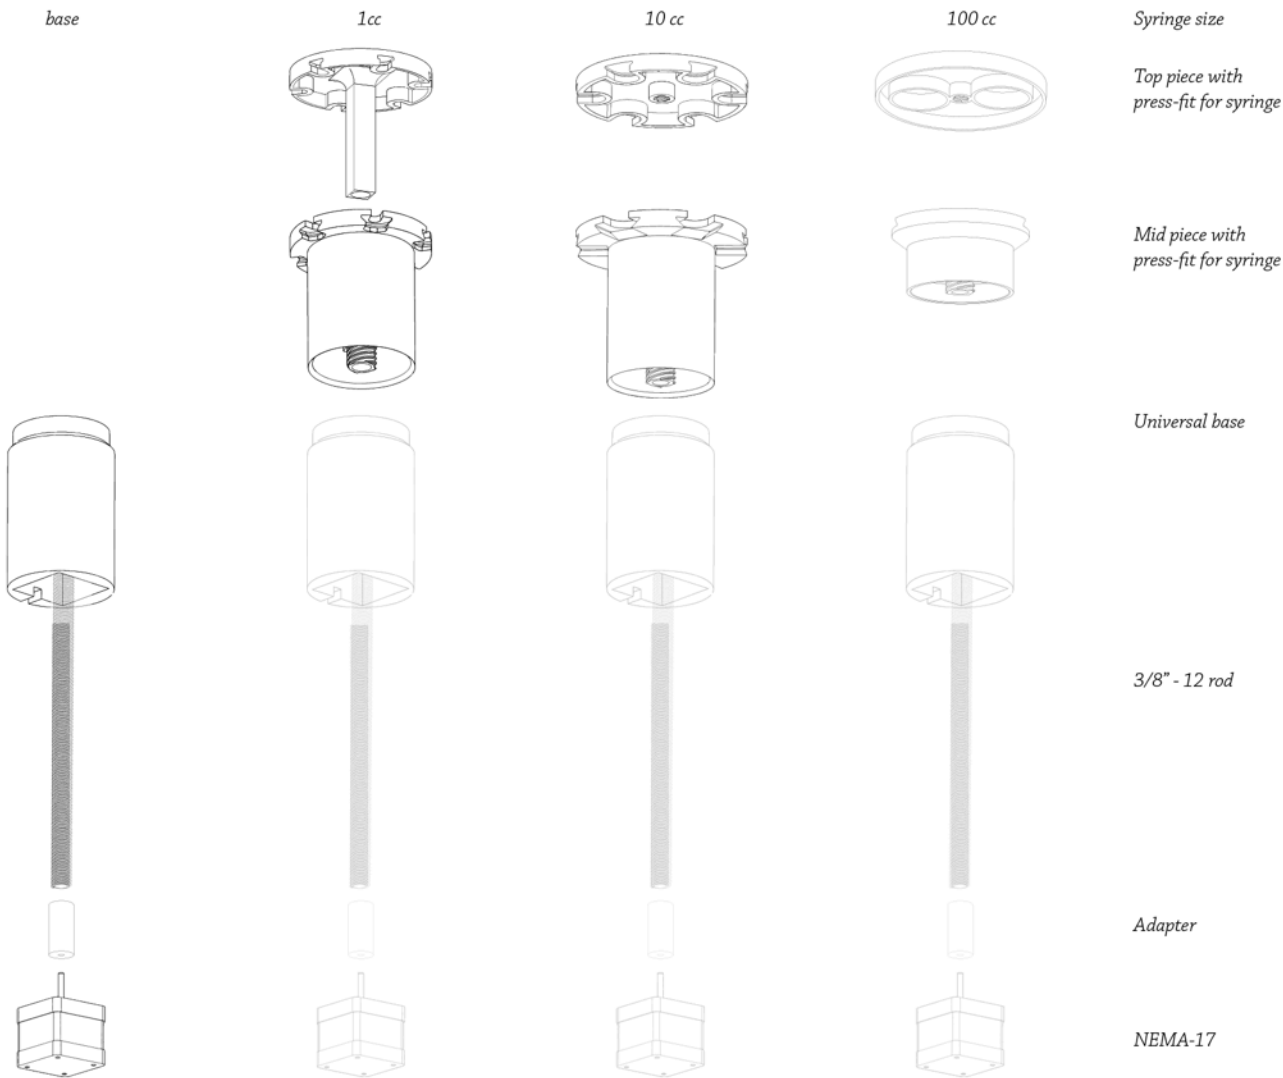

**Fig. S8 | Modular components of the syringe pump.** (Left) The base of the pump includes the Nema 17 stepper motor, a 3D printed connector, and the 3D printed base. The motor press fits into the 3D printed base. The 1cc configuration was used in the DNA assembly experiments. The Mid & Top pieces were modified to accommodate 10 and 100cc syringes.
