# Supplementary material for: DNA Assembly in 3D Printed Fluidics
Source: PLOS journal article supplement (doi:10.1371/journal.pone.0143636), 2015-12-30
Supplement: S3 (10.1371/journal.pone.0143636.s003) [file journal.pone.0143636.s003]

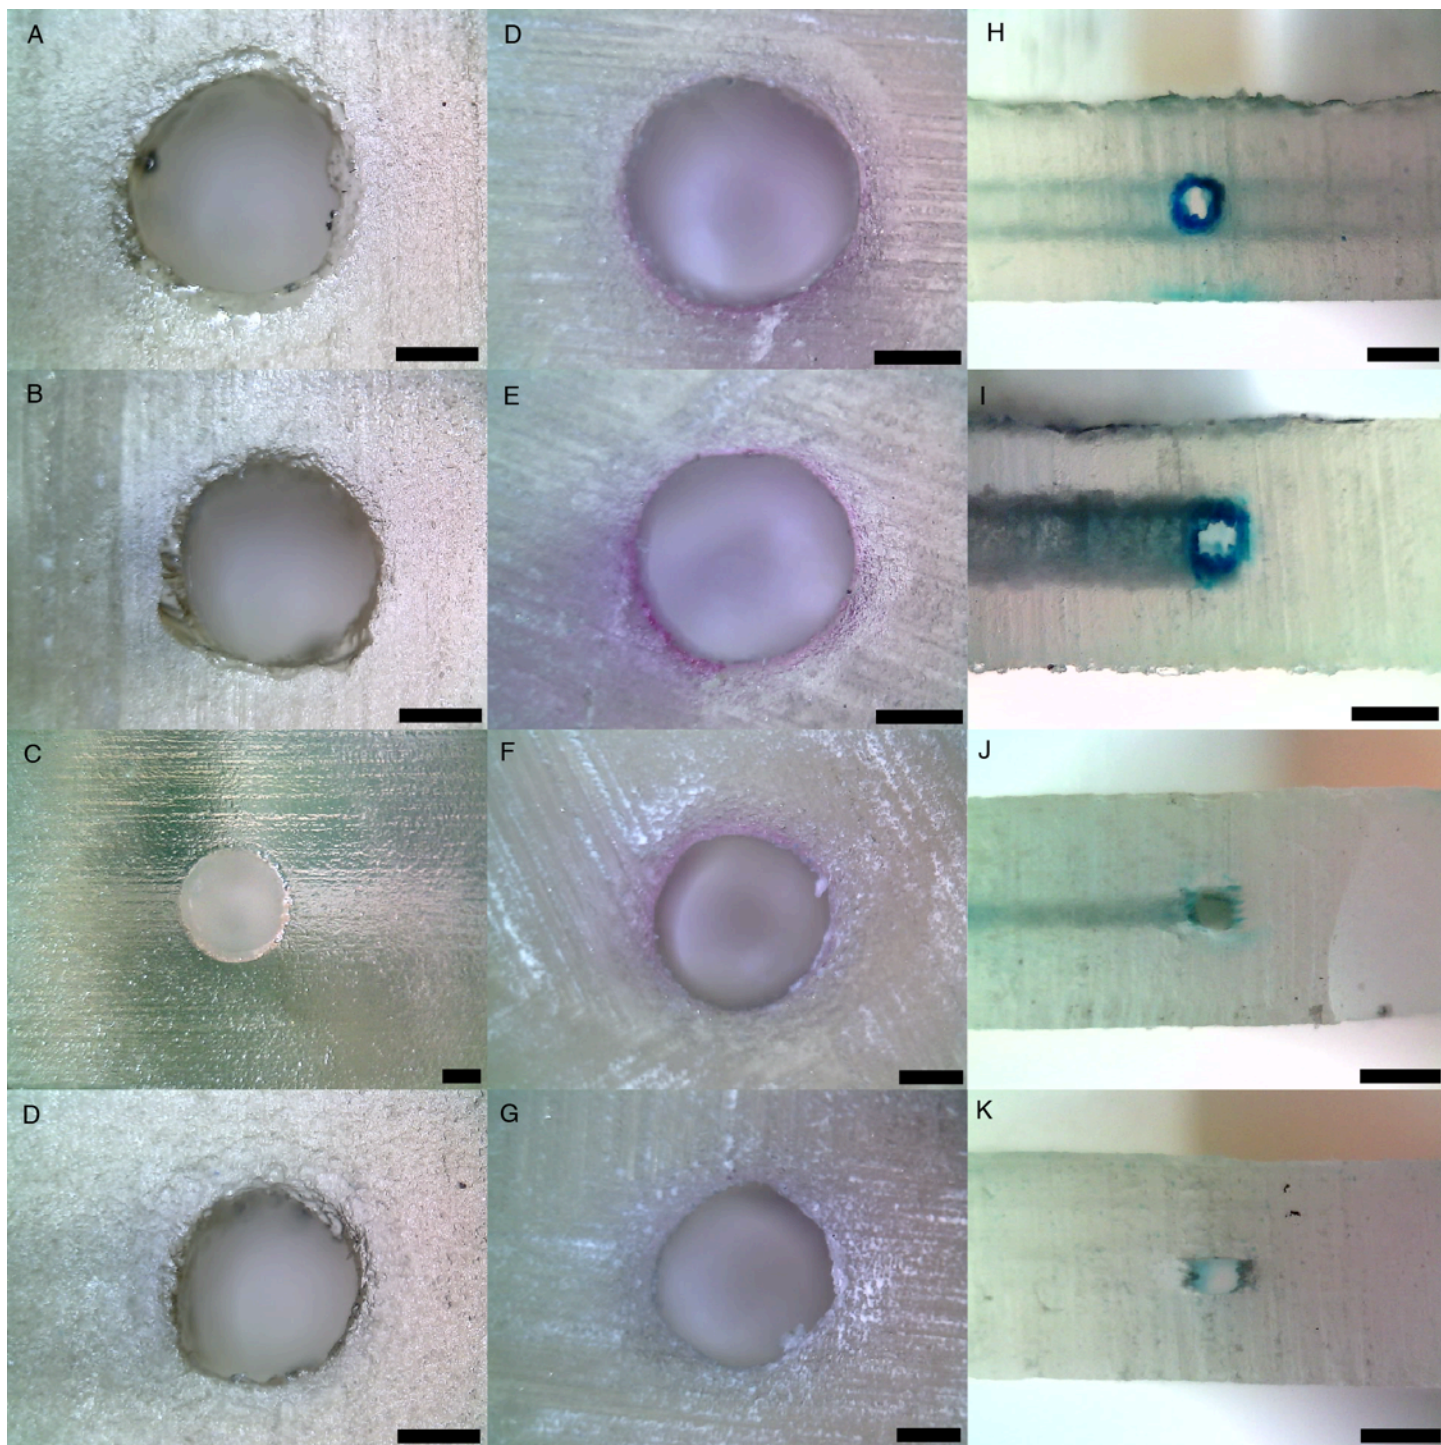

**Fig. S3 | Cross sections of fluidic devices.** Cross-sections were taken of the Form1+ Co-Laminar Mixer devices (**A-D**), Form 1+ 3D Micromixer devices (**E-H**), and SW-FUD Co-Laminar Mixer device (**I-L**). Scale bar: 0.5 mm. All images were taken using a SuperEyes B008 USB Microscope (Shenzhen D&F Co, Ltd, Shenzhen, China). Measurements of the channel dimension (diameter for the circle & side length for the square channel) can be found in **Table S1**.
