# Supplementary material for: DNA Assembly in 3D Printed Fluidics
Source: PLOS journal article supplement (doi:10.1371/journal.pone.0143636), 2015-12-30
Supplement: S5 (10.1371/journal.pone.0143636.s005) [file journal.pone.0143636.s005]

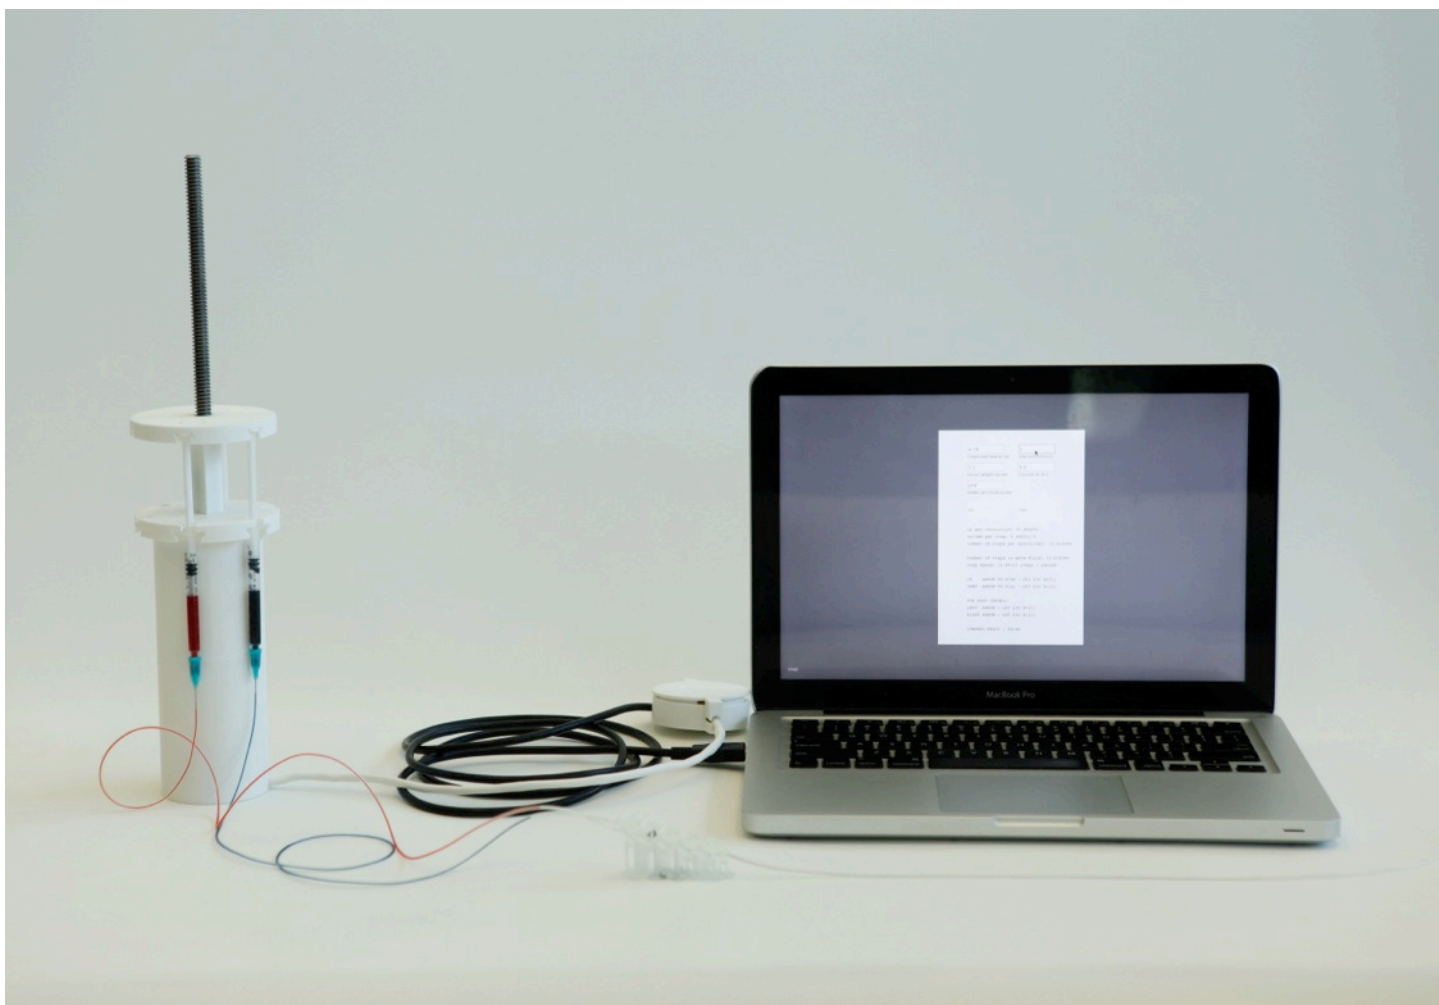

**Fig. S5 | 3D printed syringe pump.** A bespoke syringe pump and user interface was designed and fabricated for this experiment. The syringe pump was used to pull the two inputs through the device at 1 and 5  $\mu\text{L}/\text{sec}$ . The syringe pump is composed of several parts (**Fig. S7**), including 3D printed mechanical pieces, a custom designed and fabricated circuit board (**Fig. S9**), and a software user interface (**Fig. S10**). The CAD designs and software for the syringe pump have been made openly available. The total cost of the pump was \$56.33 (**Table S2**) and the 3D printed components can each be printed in less than 3 hours. Photo credit: Taylor Levy and Che-Wei Wang.
