# Supplementary material for: DNA Assembly in 3D Printed Fluidics
Source: PLOS journal article supplement (doi:10.1371/journal.pone.0143636), 2015-12-30
Supplement: S12 (10.1371/journal.pone.0143636.s012) [file journal.pone.0143636.s012]

**Table S1 | Dimensions of SW-FUD and Form 1+ cross sections (Fig. S3).**

| Device type               | D (mm)            |
|---------------------------|-------------------|
| <b>Form1+<sup>a</sup></b> |                   |
| Expected                  | 1.5               |
| A                         | $1.31 \pm 0.01^c$ |
| B                         | $1.26 \pm 0.04^c$ |
| C                         | $1.40 \pm 0.02^c$ |
| D                         | $1.14 \pm 0.02^c$ |
| E                         | $1.37 \pm 0.01^c$ |
| F                         | $1.28 \pm 0.02^c$ |
| G                         | $1.36 \pm 0.04^c$ |
| H                         | $1.40 \pm 0.06^c$ |
| Average                   | 1.30              |
| Standard deviation        | $0.12^d$          |
| <b>SW-FUD<sup>b</sup></b> |                   |
| Expected                  | 0.3               |
| I                         | $0.19 \pm 0.01^c$ |
| J                         | $0.20 \pm 0.01^c$ |
| K                         | $0.23 \pm 0.03^c$ |
| L                         | $0.26 \pm 0.04^c$ |
| Average                   | 0.22              |
| Standard deviation        | $0.06^d$          |

a: The Form1+ devices had circular channels. 3 technical replicates were collected for each circular cross section

b: SW-FUD devices had square channels. 6 technical replicates were collected for each cross-section, 3 vertically & 3 horizontally.

c. Experimental error estimate calculated using the technical replicates

d. The standard deviation of the sample population, incorporating the experimental error estimate for each sample.
